# Supplementary material
Source: HighWire-hosted journal article supplement (https://erj.ersjournals.com/content/60/3/2200266)

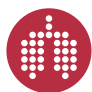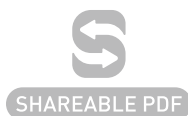

# Identification of coronavirus particles by electron microscopy requires demonstration of specific ultrastructural features

Carsten Dittmayer<sup>1</sup> and Michael Laue <sup>2</sup>

<sup>1</sup>Department of Neuropathology, Charité-Universitätsmedizin Berlin, corporate member of Freie Universität Berlin and Humboldt-Universität zu Berlin, Berlin, Germany. <sup>2</sup>National Consultant Laboratory for Electron Microscopy of Infectious Pathogens, Centre for Biological Threats and Special Pathogens 4 (ZBS 4), Robert Koch Institute, Berlin, Germany.

Corresponding author: Michael Laue ([LaueM@rki.de](mailto:LaueM@rki.de))

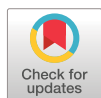

Shareable abstract (@ERSpublications)

**Unequivocal detection of ultrastructural features specific to organelles or viruses is required to infer their presence by electron microscopy. This article also provides reference images for the correct identification of coronavirus.** <https://bit.ly/3IFYDjc>

**Cite this article as:** Dittmayer C, Laue M. Identification of coronavirus particles by electron microscopy requires demonstration of specific ultrastructural features. *Eur Respir J* 2022; 60: 2200266 [DOI: 10.1183/13993003.00266-2022].

This single-page version can be shared freely online.

Copyright ©The authors 2022.

This version is distributed under the terms of the Creative Commons Attribution Non-Commercial Licence 4.0. For commercial reproduction rights and permissions contact [permissions@ersnet.org](mailto:permissions@ersnet.org)

Received: 4 Feb 2022

Accepted: 20 March 2022

*To the Editor:*

With interest we read the publication of EVANGELOU *et al.* [1], which studied SARS-CoV-2 induced senescence in severe COVID-19. Immunohistochemistry (IHC) and electron microscopy (EM) were used for *in situ* detection of SARS-CoV-2 in autopsy tissues. The authors used formalin-fixed and paraffin-embedded (FFPE) autopsy lung of COVID-19 and non-COVID-19 patients to perform re-embedding for EM and ultrastructural analysis. They report detection of SARS-CoV-2 virions within alveolar type 2 cells of representative COVID-19 cases (figure 1c in EVANGELOU *et al.* [1]). Three electron micrographs show putative virus particles, indicated by arrows, to document their findings.

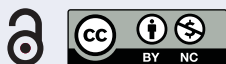

Supplement: inline-supplementary-material-1 [file inline-supplementary-material-1.pdf]
